# Supplementary material for: Phylogeographic and Paleoclimatic Modelling Tools Improve Our Understanding of the Biogeographic History of Hierophis viridiflavus (Colubridae)
Source: MDPI journal article supplement (doi:10.3390/ani13132143), 2023-06-29
Supplement: s1 [file s1]

## Supplementary material

### Supplementary text

**Supplementary Text S1.** Details on DNA extraction and sequencing for 80 unpublished sequences generated in this work

Total genomic DNA was extracted from ethanol-preserved tissues using BioSprint 15 DNA Blood Kit following the manufacturer's protocol (Qiagen, Hilden, Germany). The NADH dehydrogenase subunit 4 (ND4) was amplified for all samples by standard polymerase chain reaction (PCR), using the primer ND4-Leu [1]. In some cases, DNA amplification was not possible with this primer and thus, we used the primers ND4HvF-ND4HvR [2].

PCRs were performed in a total volume of 25µl and included 17.8µl of H<sub>2</sub>O, 2.5µl of a reaction buffer x 10, 1µl of dNTP (10mM), 1.5µl of MgCl<sub>2</sub> (50mM), 0.5µl of each primer (10mM), 0.2µl of DNA polymerase and 1µl of template DNA. The thermocycling conditions consisted of an initial denaturation at 94°C for 5 min, 40 cycles at 94°C for 30 s, 50°C for 40 s and 72°C for 45 s followed by a final step at 72°C for 10 min. PCR products were checked on 1% agarose gels, and the products of expected length were directly sequenced at Macrogen Inc (Macrogen Europe).

### References

1. Arévalo, E.; Davis, S.K.; Sites, J.W.Jr. Mitochondrial DNA sequence divergence and phylogenetic relationships among eight chromosome races of the *Sceloporus grammicus* complex (Phrynosomatidae) in Central Mexico. *Syst. Biol.* **1994**, *43*, 387–418.
2. Mezzasalma, M.; Dall'Asta, A.; Loy, A.; Cheylan, M.; Lymberakis, P.; Zuffi, M.A.L.; Tomovic, L.; Odierna, G.; Guarino, F.M. A sisters' story: Comparative phylogeography and taxonomy of *Hierophis viridiflavus* and *H. gemonensis* (Serpentes, Colubridae). *Zool. Scr.* **2015**, *44*, 495–508.

## Supplementary tables

**Table S1.** List of the analyzed samples with codes, lineage/sublineage assignment, localities, coordinates (latitude and longitude), corresponding haplotype, GenBank accession number, publication, collection and number. Samples in bold correspond to the ones which are specific of this study. TBA means to be added after acceptance.

| <b>code</b>  | <b>Lineage/Sublineage</b>    | <b>Locality</b>                     | <b>latitude</b> | <b>longitude</b> | <b>Haplotype</b> | <b>Accession numbers</b> | <b>Publication</b> | <b>Collection</b> | <b>Coll. number</b> |
|--------------|------------------------------|-------------------------------------|-----------------|------------------|------------------|--------------------------|--------------------|-------------------|---------------------|
| <i>RV01</i>  | <i>East/South-east-north</i> | San Vito (Treviso, Italy)           | 45.898          | 11.953           | H32              | MW297621                 | 1                  |                   | /                   |
| <i>RV02</i>  | <i>East/South-east-north</i> | Possagno (Treviso, Italy)           | 45.850          | 11.874           | H32              | MW297622                 | 1                  |                   | /                   |
| <i>RTR01</i> | <i>East/South-east-north</i> | Pergine Valsugana (Trento, Italy)   | 46.059          | 11.241           | H32              | MW297618                 | 1                  |                   | /                   |
| <i>RPT03</i> | <i>West</i>                  | Noasca (Torino, Italy)              | 45.454          | 7.317            | H1               | MW297556                 | 1                  |                   | /                   |
| <i>RPT02</i> | <i>West</i>                  | Pianchette (Torino, Italy)          | 45.452          | 7.293            | H1               | MW297555                 | 1                  |                   | /                   |
| <i>RPT01</i> | <i>West</i>                  | Villastellone (Torino, Italy)       | 44.923          | 7.742            | H1               | MW297553                 | 1                  |                   | /                   |
| <i>RPT04</i> | <i>West</i>                  | Fornolosa (Torino, Italy)           | 45.431          | 7.399            | H1               | MW297557                 | 1                  |                   | /                   |
| <i>RLO01</i> | <i>West</i>                  | Pavia (Italy)                       | 45.209          | 9.167            | H1               | MW297558                 | 1                  |                   | /                   |
| <i>RLO02</i> | <i>East/South-east-north</i> | Le Bine. Calvatone (Cremona, Italy) | 45.132          | 10.442           | H32              | MW297619                 | 1                  |                   | /                   |
| <i>RLO03</i> | <i>East/South-east-north</i> | Le Bine. Calvatone (Cremona, Italy) | 45.132          | 10.442           | H32              | MW297620                 | 1                  |                   | R3 (2)              |

|              |                              |                                             |        |        |     |          |   |        |
|--------------|------------------------------|---------------------------------------------|--------|--------|-----|----------|---|--------|
| <i>RE11</i>  | <i>East/South-east-north</i> | La Foscarina (Rovigo, Italy)                | 44.944 | 11.620 | H32 | MW297623 | 1 | /      |
| <i>RE12</i>  | <i>West</i>                  | Casalecchio (Rimini, Italy)                 | 43.836 | 12.268 | H1  | MW297561 | 1 | R3 (2) |
| <i>RE13</i>  | <i>West</i>                  | Villa di Sant'Alessio (Forlì-Cesena, Italy) | 43.810 | 11.987 | H1  | MW297562 | 1 | /      |
| <i>RLI01</i> | <i>West</i>                  | Genova (Italy)                              | 44.394 | 9.017  | H1  | MW297559 | 1 | /      |
| <i>RLI02</i> | <i>West</i>                  | Genova (Italy)                              | 44.394 | 9.017  | H1  | MW297560 | 1 | /      |
| <i>RT14</i>  | <i>West</i>                  | Frosini (Siena, Italy)                      | 43.216 | 11.155 | H1  | MW297575 | 1 | R3 (2) |
| <i>RT15</i>  | <i>West</i>                  | Rosia (Siena, Italy)                        | 43.250 | 11.224 | H1  | MW297576 | 1 | R3 (2) |
| <i>RT17</i>  | <i>West</i>                  | Baccinello (Grosseto, Italy)                | 42.796 | 11.375 | H1  | MW297578 | 1 | /      |
| <i>RT18</i>  | <i>West</i>                  | Campagnatico (Grosseto, Italy)              | 42.887 | 11.242 | H1  | MW297579 | 1 | R2 (2) |
| <i>RT19</i>  | <i>West</i>                  | Petriccio (Grosseto, Italy)                 | 43.079 | 10.997 | H1  | MW297580 | 1 | R2 (2) |
| <i>RT12</i>  | <i>West</i>                  | Boccheggiano (Grosseto, Italy)              | 43.082 | 11.025 | H1  | MW297573 | 1 | /      |
| <i>RT13</i>  | <i>West</i>                  | Boccheggiano (Grosseto, Italy)              | 43.082 | 11.025 | H1  | MW297574 | 1 | /      |
| <i>RT10</i>  | <i>West</i>                  | Prata (Grosseto, Italy)                     | 43.081 | 10.984 | H1  | MW297571 | 1 | /      |
| <i>RT11</i>  | <i>West</i>                  | Prata (Grosseto, Italy)                     | 43.081 | 10.984 | H1  | MW297572 | 1 | /      |
| <i>RT16</i>  | <i>West</i>                  | Prata (Grosseto, Italy)                     | 43.081 | 10.984 | H1  | MW297577 | 1 | /      |
| <i>RT20</i>  | <i>West</i>                  | Prata (Grosseto, Italy)                     | 43.079 | 10.988 | H1  | MW297581 | 1 | /      |
| <i>RT21</i>  | <i>West</i>                  | Tatti (Grosseto, Italy)                     | 43.025 | 11.029 | H1  | MW297582 | 1 | R2 (2) |
| <i>RT22</i>  | <i>West</i>                  | Camaldoli (Arezzo, Italy)                   | 43.794 | 11.820 | H1  | MW297583 | 1 | R3 (2) |

|       |      |                                      |        |        |     |          |   |                |
|-------|------|--------------------------------------|--------|--------|-----|----------|---|----------------|
| RT23  | West | Sgrillozzo (Grosseto, Italy)         | 42.537 | 11.406 | H1  | MW297584 | 1 | R2 (2)         |
| RT24  | West | Massa Marittima (Grosseto, Italy)    | 43.051 | 10.889 | H1  | MW297585 | 1 | /              |
| RT25  | West | Portiglione (Grosseto, Italy)        | 42.881 | 10.781 | H1  | MW297586 | 1 | R2 (1). R4 (1) |
| RT26  | West | Follonica (Grosseto, Italy)          | 42.930 | 10.762 | H1  | MW297587 | 1 | R2 (2)         |
| RT27  | West | Pian D'Alma (Grosseto, Italy)        | 42.856 | 10.775 | H1  | MW297588 | 1 | R2 (1). R4 (1) |
| RT29  | West | Cerboli (Livorno, Italy)             | 42.858 | 10.547 | H1  | MW297589 | 1 | R2 (2)         |
| RT30  | West | Firenze (Italy)                      | 43.785 | 11.218 | H1  | MW297590 | 1 | R2 (1). R4 (1) |
| RT31  | West | Siena (Italy)                        | 43.314 | 11.330 | H2  | MW297591 | 1 | R3 (2)         |
| RT53  | West | Podere Corso (Grosseto, Italy)       | 42.659 | 11.238 | H1  | MW297592 | 1 | /              |
| RMA01 | West | Torrette (Pesaro e Urbino, Italy)    | 43.793 | 13.085 | H1  | MW297563 | 1 | R2 (2)         |
| RMA02 | West | Abbadia di Fiastra (Macerata, Italy) | 43.228 | 13.430 | H1  | MW297564 | 1 | R2 (2)         |
| RSA08 | West | Limbara (Olbia-Tempio, Italy)        | 40.856 | 9.158  | H1  | MW297568 | 1 | /              |
| RSA03 | West | Alghero (Italy)                      | 40.587 | 8.370  | H1  | MW297565 | 1 | R3 (2)         |
| RSA07 | West | Alghero (Italy)                      | 40.587 | 8.370  | H1  | MW297566 | 1 | R3 (2)         |
| RSA09 | West | Alghero (Italy)                      | 40.587 | 8.370  | H1  | MW297567 | 1 | /              |
| RSA12 | West | Monti (Olbia-Tempio, Italy)          | 40.805 | 9.321  | H11 | MW297569 | 1 | /              |

|              |                     |                                      |        |        |     |          |   |                   |
|--------------|---------------------|--------------------------------------|--------|--------|-----|----------|---|-------------------|
| <i>RSA21</i> | <i>West</i>         | Aglientu (Olbia-Tempio, Italy)       | 41.079 | 9.114  | H1  | MW297570 | 1 | /                 |
| <i>RU03</i>  | <i>West</i>         | Città di Castello (Perugia, Italy)   | 43.496 | 12.249 | H1  | MW297593 | 1 | R2 (2)            |
| <i>RU04</i>  | <i>West</i>         | Città della Pieve (Perugia, Italy)   | 42.947 | 12.006 | H3  | MW297594 | 1 | R3 (2)            |
| <i>RL77</i>  | <i>West</i>         | Rieti (Italy)                        | 42.367 | 12.898 | H1  | MW297601 | 1 | /                 |
| <i>RL35</i>  | <i>West</i>         | Belmonte Castello (Frosinone, Italy) | 41.574 | 13.800 | H1  | MW297595 | 1 | R3 (1).<br>R5(1)  |
| <i>RL78</i>  | <i>East/Central</i> | Puzzali (Frosinone, Italy)           | 41.311 | 13.766 | H22 | MW297616 | 1 | /                 |
| <i>RL54</i>  | <i>West</i>         | Itri (Latina, Italy)                 | 41.290 | 13.532 | H1  | MW297599 | 1 | R2 (2)            |
| <i>RL36</i>  | <i>West</i>         | Fogolino (Roma, Italy)               | 41.461 | 12.697 | H1  | MW297596 | 1 | R2 (1). R4<br>(1) |
| <i>RL37</i>  | <i>West</i>         | Fogolino (Roma, Italy)               | 41.461 | 12.697 | H1  | MW297597 | 1 | R3 (1).<br>R5(1)  |
| <i>RL76</i>  | <i>West</i>         | Morlupo (Roma, Italy)                | 42.149 | 12.503 | H1  | MW297600 | 1 | R3 (2)            |
| <i>RL45</i>  | <i>West</i>         | Capena (Roma, Italy)                 | 42.141 | 12.539 | H1  | MW297598 | 1 | R3 (2)            |
| <i>RL81</i>  | <i>West</i>         | Monti Lepini (Latina, Italy)         | 41.602 | 13.094 | H1  | MW297602 | 1 | R3 (2)            |
| <i>RL209</i> | <i>West</i>         | Sperlonga (Latina, Italy)            | 41.247 | 13.466 | H1  | MW297603 | 1 | R1 (1). R2<br>(1) |
| <i>RL210</i> | <i>West</i>         | Spadellata (Roma, Italy)             | 41.514 | 12.607 | H1  | MW297604 | 1 | /                 |
| <i>RL211</i> | <i>West</i>         | Spadellata (Roma, Italy)             | 41.514 | 12.607 | H1  | MW297605 | 1 | R3 (2)            |
| <i>RL216</i> | <i>West</i>         | Monte Piano(Roma, Italy)             | 41.255 | 13.471 | H1  | MW297606 | 1 | /                 |

|       |                       |                                       |        |        |     |          |   |                   |
|-------|-----------------------|---------------------------------------|--------|--------|-----|----------|---|-------------------|
| RL229 | West                  | Monte Piano(Roma, Italy)              | 41.247 | 13.466 | H1  | MW297607 | 1 | /                 |
| RL230 | West                  | Roma (Italy)                          | 41.896 | 12.577 | H1  | MW297608 | 1 | R2 (2)            |
| RL234 | West                  | Roma (Italy)                          | 41.896 | 12.577 | H1  | MW297611 | 1 | R3 (2)            |
| RL231 | West                  | Monte Piano(Roma, Italy)              | 41.247 | 13.466 | H1  | MW297609 | 1 | R3 (2)            |
| RL232 | West                  | Roma (Italy)                          | 41.935 | 12.644 | H1  | MW297610 | 1 | /                 |
| RL235 | East/Central          | San Giorgio a Liri (Frosinone, Italy) | 41.416 | 13.764 | H21 | MW297617 | 1 | R2 (2)            |
| RL236 | West                  | Castel Porziano (Roma, Italy)         | 41.744 | 12.399 | H1  | MW297612 | 1 | /                 |
| RL237 | West                  | Roma (Italy)                          | 41.976 | 12.483 | H5  | MW297554 | 1 | R2 (1). R4<br>(1) |
| RL238 | West                  | Nettuno (Roma, Italy)                 | 41.451 | 12.764 | H1  | MW297613 | 1 | /                 |
| RL239 | West                  | Fregene (Roma, Italy)                 | 41.855 | 12.198 | H1  | MW297614 | 1 | R2 (2)            |
| RL240 | West                  | Manziana (Roma, Italy)                | 42.131 | 12.126 | H1  | MW297615 | 1 | R2 (2)            |
| RC56  | East/Central          | Ailano (Caserta, Italy)               | 41.385 | 14.213 | H21 | MW297635 | 1 | R1 (1). R2<br>(1) |
| RC46  | East/Central          | Piedimonte Matese (Caserta, Italy)    | 41.388 | 14.404 | H21 | MW297625 | 1 | /                 |
| RC47  | East/Central          | Monte Orfano (Caserta, Italy)         | 41.388 | 14.404 | H21 | MW297626 | 1 | /                 |
| RC50  | East/South-east-north | Monte Orfano (Caserta, Italy)         | 41.388 | 14.404 | H32 | MW297629 | 1 | R1 (1). R2<br>(1) |
| RC48  | East/Central          | San Gregorio Matese (Caserta, Italy)  | 41.388 | 14.409 | H21 | MW297627 | 1 | R1 (1). R4<br>(1) |

|      |                       |                                    |        |        |     |          |   |                |
|------|-----------------------|------------------------------------|--------|--------|-----|----------|---|----------------|
| RC45 | East/Central          | Piedimonte Matese(Caserta, Italy)  | 41.348 | 14.375 | H21 | MW297624 | 1 | R1 (1). R2 (1) |
| RC55 | East/Central          | Cusano Mutri (Benevento, Italy)    | 41.316 | 14.528 | H21 | MW297634 | 1 | R3 (2)         |
| RC52 | East/South-east-north | Postiglione (Salerno, Italy)       | 40.554 | 15.216 | H32 | MW297631 | 1 | /              |
| RC54 | East/South-east-north | Postiglione (Salerno, Italy)       | 40.554 | 15.216 | H32 | MW297633 | 1 | /              |
| RC51 | East/South-east-north | Castelcivita (Salerno, Italy)      | 40.496 | 15.228 | H31 | MW297630 | 1 | R1 (1). R2 (1) |
| RC53 | East/South-east-north | Monti Alburni (Salerno, Italy)     | 40.474 | 15.276 | H31 | MW297632 | 1 | R4 (2)         |
| RC49 | East/South-east-north | Monticello (Caserta, Italy)        | 41.119 | 14.350 | H31 | MW297628 | 1 | R3 (2)         |
| RM01 | East/South-east-north | Longano (Isernia, Italy)           | 41.523 | 14.266 | H32 | MW297636 | 1 | R1 (1). R2 (1) |
| RM02 | East/South-east-north | Bojano(Campobasso, Italy)          | 41.492 | 14.464 | H32 | MW297637 | 1 | R1 (1). R2 (1) |
| RM03 | East/South-east-north | Colle San Leonardo (Chieti, Italy) | 41.568 | 14.287 | H32 | MW297638 | 1 | R3 (1). R6 (1) |
| RB07 | East/South-east-north | Maratea (Potenza, Italy)           | 40.071 | 15.707 | H28 | MW297649 | 1 | /              |

|      |                       |                                                 |        |        |     |          |   |                |
|------|-----------------------|-------------------------------------------------|--------|--------|-----|----------|---|----------------|
| RB08 | East/South-east-north | Lauria (Potenza, Italy)                         | 40.044 | 15.845 | H32 | MW297650 | 1 | /              |
| RB09 | East/South-east-north | Fiumicello Santa Venere (Potenza, Italy)        | 39.999 | 15.700 | H32 | MW297651 | 1 | /              |
| RP09 | East/South-east-north | Peschici (Foggia, Italy)                        | 41.947 | 16.013 | H32 | MW297652 | 1 | R1 (1). R4 (1) |
| RP17 | East/South-east-north | Ischitella(Foggia, Italy)                       | 41.906 | 15.899 | H32 | MW297653 | 1 | /              |
| RP19 | East/South-east-north | Torre Dell'Orso (Lecce, Italy)                  | 40.164 | 18.245 | H32 | MW297654 | 1 | R1 (2)         |
| RP25 | East/South-east-north | Uggiano la Chiesa (Lecce, Italy)                | 40.129 | 18.473 | H30 | MW297655 | 1 | /              |
| RP26 | East/South-east-north | Masseria Cesine. Vernole (Lecce, Italy)         | 40.347 | 18.337 | H32 | MW297656 | 1 | /              |
| RP28 | East/South-east-north | Ruvo di Puglia(Bari, Italy)                     | 41.034 | 16.495 | H25 | MW297657 | 1 | /              |
| RP32 | East/South-east-north | Masseria Pellicciari(Bari, Italy)               | 40.875 | 16.442 | H25 | MW297660 | 1 | /              |
| RP34 | East/South-east-north | Castel del Monte (Barletta-Andria-Trani, Italy) | 41.072 | 16.266 | H25 | MW297661 | 1 | /              |
| RP35 | East/South-east-north | Zapponeta (Foggia, Italy)                       | 41.435 | 15.998 | H25 | MW297662 | 1 | /              |

|        |                       |                                                  |        |        |     |          |   |                |
|--------|-----------------------|--------------------------------------------------|--------|--------|-----|----------|---|----------------|
| RP30   | East/South-east-north | Invaso del Locone (Barletta-Andria-Trani, Italy) | 41.064 | 16.009 | H25 | MW297658 | 1 | /              |
| RP36   | East/South-east-north | Trullo di Sopra (Bari, Italy)                    | 40.972 | 16.326 | H24 | MW297663 | 1 | /              |
| RP31   | East/South-east-north | Mottola (Taranto, Italy)                         | 40.621 | 17.062 | H23 | MW297659 | 1 | /              |
| RCL124 | East/South-east-north | Cetraro (Taranto, Italy)                         | 39.541 | 15.993 | H32 | MW297648 | 1 | /              |
| RCL10  | East/Sicily           | Lattarico (Cosenza, Italy)                       | 39.464 | 16.138 | H19 | MW297641 | 1 | /              |
| RCL08  | East/South-east-north | Montalto Uffugo (Cosenza, Italy)                 | 39.407 | 16.157 | H25 | MW297640 | 1 | /              |
| RCL123 | East/South-east-north | Falconara (Cosenza, Italy)                       | 39.275 | 16.093 | H32 | MW297647 | 1 | R1 (1). R4 (1) |
| RCL120 | East/South-east-north | Fiumefreddo Bruzio (Cosenza, Italy)              | 39.232 | 16.073 | H32 | MW297644 | 1 | /              |
| RCL121 | East/South-east-north | Fiumefreddo Bruzio (Cosenza, Italy)              | 39.232 | 16.073 | H32 | MW297645 | 1 | /              |
| RCL122 | East/South-east-north | Fiumefreddo Bruzio (Cosenza, Italy)              | 39.232 | 16.073 | H32 | MW297646 | 1 | /              |
| RCL11  | East/South-east-north | San Luca (Reggio Calabria, Italy)                | 38.167 | 16.000 | H32 | MW297642 | 1 | /              |
| RCL12  | East/Sicily           | Brancaleone (Reggio Calabria, Italy)             | 37.971 | 16.098 | H19 | MW297643 | 1 | R1 (1). R4 (1) |

|       |                       |                                     |        |        |     |          |   |                |
|-------|-----------------------|-------------------------------------|--------|--------|-----|----------|---|----------------|
| RCL02 | East/South-east-north | Palizzi(Reggio Calabria, Italy)     | 37.966 | 15.988 | H32 | MW297639 | 1 | /              |
| RS171 | East/Sicily           | Monti Peloritani (Messina, Italy)   | 38.050 | 15.333 | H20 | MW297674 | 1 | R1 (2)         |
| RS14  | East/Sicily           | Gole Alcantara (Catania, Italy)     | 37.877 | 15.177 | H14 | MW297664 | 1 | R4 (2)         |
| RS43  | East/Sicily           | Saline di Priolo (Siracusa, Italy)  | 37.146 | 15.220 | H14 | MW297667 | 1 | R4 (2)         |
| RS219 | East/Sicily           | Vittoria (Ragusa, Italy)            | 36.966 | 14.565 | H14 | MW297676 | 1 | /              |
| RS162 | East/Sicily           | Manfria (Caltanissetta, Italy)      | 37.113 | 14.154 | H17 | MW297673 | 1 | /              |
| RS27  | East/Sicily           | Scala dei Turchi (Agrigento, Italy) | 37.294 | 13.469 | H14 | MW297665 | 1 | /              |
| RS28  | East/Sicily           | Scala dei Turchi (Agrigento, Italy) | 37.294 | 13.469 | H14 | MW297666 | 1 | /              |
| RS156 | East/Sicily           | Siculiana (Agrigento, Italy)        | 37.339 | 13.391 | H18 | MW297672 | 1 | /              |
| RS70  | East/Sicily           | Favignana (Trapani, Italy)          | 37.945 | 12.296 | H20 | MW297671 | 1 | /              |
| RS55  | East/Sicily           | Monte Cofano (Trapani, Italy)       | 38.099 | 12.666 | H20 | MW297670 | 1 | /              |
| RS53  | East/Sicily           | San Vito lo Capo (Trapani, Italy)   | 38.119 | 12.734 | H20 | MW297669 | 1 | R4 (2)         |
| RS253 | East/Sicily           | Cerda (Palermo, Italy)              | 37.895 | 13.828 | H15 | MW297677 | 1 | /              |
| RS45  | East/Sicily           | Cefalù (Palermo, Italy)             | 38.024 | 14.055 | H14 | MW297668 | 1 | R1 (1). R4 (1) |

|       |                       |                                |        |        |     |          |   |   |
|-------|-----------------------|--------------------------------|--------|--------|-----|----------|---|---|
| RS269 | East/Sicily           | Monti Nebrodi (Messina, Italy) | 37.890 | 14.652 | H14 | MW297678 | 1 | / |
| RS295 | East/Sicily           | Lipari (Messina, Italy)        | 38.483 | 14.946 | H16 | MW297679 | 1 | / |
| RL79  | West                  | Ventotene (Latina, Italy)      | 40.798 | 13.432 | H1  | KY923286 | 2 | / |
| RL22  | West                  | Ponza (Latina, Italy)          | 40.896 | 12.959 | H1  | KY923284 | 2 | / |
| RL66  | West                  | Ponza (Latina, Italy)          | 40.896 | 12.959 | H1  | KY923285 | 2 | / |
| RL80  | West                  | Palmarola (Latina, Italy)      | 40.936 | 12.859 | H1  | KY923287 | 2 | / |
| RS276 | East/Sicily           | Vulcano (Messina, Italy)       | 38.420 | 14.958 | H14 | KY923282 | 2 | / |
| RS85  | East/Sicily           | Favignana (Trapani, Italy)     | 37.945 | 12.296 | H20 | KY923281 | 2 | / |
| RS296 | East/Sicily           | Ragusa (Italy)                 | 36.926 | 14.725 | H14 | KY923283 | 2 | / |
| Hv15  | East/South-east-north | Padriciano (Italy)             | 45.641 | 13.827 | H25 | LN552059 | 3 | / |
| Hv33  | East/South-east-north | Talponedo (Italy)              | 45.722 | 12.469 | H32 | LN552077 | 3 | / |
| Hv17  | East/South-east-north | Pavia (Italy)                  | 45.174 | 9.166  | H32 | LN552061 | 3 | / |
| Hv22  | East/South-east-north | Mantova (Italy)                | 45.168 | 10.807 | H32 | LN552066 | 3 | / |
| Hv44  | East/South-east-north | Aosta (Italy)                  | 45.728 | 7.301  | H31 | LN552088 | 3 | / |
| Hv5   | East/South-east-north | Lentiai (Italy)                | 46.048 | 12.025 | H32 | LN552049 | 3 | / |
| Hv34  | West                  | Tombolo (Italy)                | 45.646 | 11.837 | H1  | LN552078 | 3 | / |

|      |                           |                                    |        |        |     |          |   |   |
|------|---------------------------|------------------------------------|--------|--------|-----|----------|---|---|
| Hv27 | East/South-east-<br>north | Valle Strona (Italy)               | 45.608 | 8.811  | H31 | LN552071 | 3 | / |
| Hv28 | West                      | Asti (Italy)                       | 44.894 | 8.235  | H1  | LN552072 | 3 | / |
| Hv43 | West                      | Alessa/ria (Italy)                 | 44.912 | 8.593  | H1  | LN552087 | 3 | / |
| Hv21 | East/South-east-<br>north | Montenovo (Italy)                  | 44.073 | 12.301 | H32 | LN552065 | 3 | / |
| Hv40 | East/South-east-<br>north | Monzuno (Italy)                    | 44.278 | 11.274 | H32 | LN552084 | 3 | / |
| Hv42 | East/South-east-<br>north | San Bartolomeo in Bosco<br>(Italy) | 44.735 | 11.637 | H32 | LN552086 | 3 | / |
| Hv4  | West                      | Pisa (Italy)                       | 43.696 | 10.349 | H1  | LN552048 | 3 | / |
| Hv19 | West                      | Capraia (Italy)                    | 43.029 | 9.827  | H1  | LN552063 |   | / |
| Hv30 | West                      | Campi Bisenzio (Italy)             | 43.829 | 11.138 | H1  | LN552074 | 3 | / |
| Hv35 | West                      | Calci (Italy)                      | 43.714 | 10.5   | H1  | LN552079 | 3 | / |
| Hv31 | West                      | Lamone (Italy)                     | 43.857 | 10.297 | H1  | LN552075 | 3 | / |
| Hv45 | West                      | Asinara (Italy)                    | 41.081 | 8.293  | H1  | LN552089 | 3 | / |
| Hv6  | West                      | Sefro (Italy)                      | 43.149 | 12.95  | H1  | LN552050 | 3 | / |
| Hv10 | East/South-east-<br>north | Ancona (Italy)                     | 43.605 | 13.543 | H32 | LN552054 | 3 | / |
| Hv14 | East/South-east-<br>north | Ancona (Italy)                     | 43.606 | 13.543 | H32 | LN552058 | 3 | / |
| Hv8  | West                      | Monterano (Italy)                  | 42.138 | 12.099 | H1  | LN552052 | 3 | / |
| Hv36 | West                      | Roma (Italy)                       | 41.913 | 12.482 | H1  | LN552080 | 3 | / |

|      |                       |                            |        |        |     |          |   |   |
|------|-----------------------|----------------------------|--------|--------|-----|----------|---|---|
| Hv50 | East/South-east-north | Pescara (Italy)            | 42.461 | 14.185 | H32 | LN552094 | 3 | / |
| Hv2  | East/Central          | Pietraroja (Italy)         | 41.346 | 14.552 | H21 | LN552046 | 3 | / |
| Hv7  | East/Central          | Avellino (Italy)           | 40.916 | 14.758 | H21 | LN552051 | 3 | / |
| Hv11 | East/South-east-north | Cava dei Tirreni (Italy)   | 40.695 | 14.717 | H32 | LN552055 | 3 | / |
| Hv16 | East/Central          | Amalfi (Italy)             | 40.636 | 14.606 | H21 | LN552060 | 3 | / |
| Hv18 | East/South-east-north | Palinuro (Italy)           | 40.03  | 15.282 | H32 | LN552062 | 3 | / |
| Hv51 | East/Central          | Soccavo (Italy)            | 40.852 | 14.206 | H21 | LN552095 | 3 | / |
| Hv1  | East/South-east-north | Lagonegro (Italy)          | 40.125 | 15.77  | H29 | LN552045 | 3 | / |
| Hv9  | East/South-east-north | Cetraro (Italy)            | 39.541 | 15.993 | H32 | LN552053 | 3 | / |
| Hv12 | East/South-east-north | Vallone Argentino (Italy)  | 39.428 | 16.126 | H32 | LN552056 | 3 | / |
| Hv46 | East/South-east-north | San Nicola Arcella (Italy) | 39.843 | 15.797 | H32 | LN552090 | 3 | / |
| Hv13 | East/South-east-north | Bovino (Italy)             | 41.253 | 15.345 | H32 | LN552057 | 3 | / |
| Hv24 | East/South-east-north | Lecce (Italy)              | 40.356 | 18.147 | H32 | LN552068 | 3 | / |
| Hv47 | East/Sicily           | Lago Spartà (Italy)        | 37.955 | 14.715 | H14 | LN552091 | 3 | / |

|      |                           |                                 |        |        |     |          |   |   |
|------|---------------------------|---------------------------------|--------|--------|-----|----------|---|---|
| Hv20 | East/Sicily               | Iria (Italy)                    | 38.038 | 14.637 | H14 | LN552064 | 3 | / |
| Hv25 | West                      | Blegiers (France)               | 44.18  | 6.416  | H1  | LN552069 | 3 | / |
| Hv26 | West                      | Montagnac la Crempx<br>(France) | 44.98  | 0.544  | H1  | LN552070 | 3 | / |
| Hv29 | West                      | Brusques (France)               | 43.772 | 2.944  | H1  | LN552073 | 3 | / |
| Hv37 | West                      | Castelnau Chalosse (France)     | 43.667 | -0.846 | H1  | LN552081 | 3 | / |
| Hv38 | West                      | Millau (France)                 | 44.105 | 3.046  | H1  | LN552082 | 3 | / |
| Hv39 | West                      | Larzac (France)                 | 43.876 | 3.306  | H1  | LN552083 | 3 | / |
| Hv48 | West                      | Greolieres (France)             | 43.797 | 6.943  | H1  | LN552092 | 3 | / |
| Hv49 | West                      | Clumanc (France)                | 44.022 | 6.377  | H1  | LN552093 | 3 | / |
| Hv23 | West                      | Calanca (France)                | 41.651 | 8.894  | H1  | LN552067 | 3 | / |
| Hv41 | West                      | Biguglia (France)               | 42.622 | 9.444  | H1  | LN552085 | 3 | / |
| Hv32 | East/South-east-<br>north | Obzova (France)                 | 45.003 | 14.706 | H27 | LN552076 | 3 | / |
| Hv3  | West                      | Arties (Spain)                  | 42.701 | 0.869  | H1  | LN552047 | 3 | / |
| V24  | East/South-east-<br>north | Avio (Italy)                    | 45.727 | 10.945 | H32 | FJ430636 | 4 | / |
| V19  | East/South-east-<br>north | Doberdò del Lago (Italy)        | 45.844 | 13.543 | H25 | FJ430655 | 4 | / |
| V1   | East/South-east-<br>north | Cascina Settimo (Italy)         | 45.255 | 9.215  | H32 | FJ430644 | 4 | / |
| V3   | East/South-east-<br>north | Ardenno (Italy)                 | 46.167 | 9.651  | H32 | FJ430622 | 4 | / |

|     |                              |                             |        |        |     |          |   |   |
|-----|------------------------------|-----------------------------|--------|--------|-----|----------|---|---|
| V18 | <i>East/South-east-north</i> | Capiago Intimiano (Italy)   | 45.772 | 9.128  | H32 | FJ430651 | 4 | / |
| V20 | <i>East/South-east-north</i> | Travacò Siccomarino (Italy) | 45.151 | 9.158  | H32 | FJ430633 | 4 | / |
| V25 | <i>East/South-east-north</i> | Limbiate (Italy)            | 45.597 | 9.114  | H32 | FJ430637 | 4 | / |
| V26 | <i>East/South-east-north</i> | Limbiate (Italy)            | 45.597 | 9.114  | H32 | FJ430638 | 4 | / |
| V13 | <i>East/South-east-north</i> | Lentiai (Italy)             | 46.048 | 12.025 | H32 | FJ430641 | 4 | / |
| V14 | <i>East/South-east-north</i> | Lentiai (Italy)             | 46.048 | 12.025 | H32 | FJ430643 | 4 | / |
| V15 | <i>East/South-east-north</i> | Lentiai (Italy)             | 46.049 | 12.025 | H32 | FJ430645 | 4 | / |
| V16 | <i>East/South-east-north</i> | Lentiai (Italy)             | 46.049 | 12.025 | H32 | FJ430646 | 4 | / |
| V2  | <i>West</i>                  | Voltaggio (Italy)           | 44.628 | 8.843  | H1  | FJ430648 | 4 | / |
| V21 | <i>East/South-east-north</i> | Briga Novarese (Italy)      | 45.739 | 8.447  | H31 | FJ430634 | 4 | / |
| V42 | <i>West</i>                  | Villavernia (Italy)         | 44.823 | 8.855  | H12 | FJ430660 | 4 | / |
| V23 | <i>East/South-east-north</i> | Comacchio (Italy)           | 44.69  | 12.176 | H32 | FJ430635 | 4 | / |

|     |                              |                              |        |        |     |          |   |   |
|-----|------------------------------|------------------------------|--------|--------|-----|----------|---|---|
| V27 | <i>East/South-east-north</i> | Travo (Italy)                | 44.861 | 9.547  | H32 | FJ430639 | 4 | / |
| V4  | <i>West</i>                  | Isola di Montecristo (Italy) | 42.341 | 10.318 | H1  | FJ430631 | 4 | / |
| V6  | <i>West</i>                  | Isola di Montecristo (Italy) | 42.341 | 10.318 | H1  | FJ430630 | 4 | / |
| V7  | <i>West</i>                  | Isola di Montecristo (Italy) | 42.341 | 10.318 | H1  | FJ430627 | 4 | / |
| V8  | <i>West</i>                  | Isola di Montecristo (Italy) | 42.341 | 10.318 | H1  | FJ430632 | 4 | / |
| V33 | <i>West</i>                  | Pisa (Italy)                 | 43.696 | 10.349 | H1  | FJ430652 | 4 | / |
| V12 | <i>West</i>                  | Asinara (Italy)              | 41.081 | 8.293  | H1  | FJ430642 | 4 | / |
| V22 | <i>West</i>                  | Asinara (Italy)              | 41.081 | 8.293  | H1  | FJ430640 | 4 | / |
| V41 | <i>West</i>                  | Teulada (Spain)              | 38.969 | 8.763  | H9  | FJ430659 | 4 | / |
| V38 | <i>West</i>                  | Roccamassima (Italy)         | 41.68  | 12.921 | H4  | FJ430658 | 4 | / |
| V17 | <i>East/Central</i>          | Salerno (Italy)              | 40.687 | 14.759 | H21 | FJ430647 | 4 | / |
| V35 | <i>East/Central</i>          | Avella (Italy)               | 40.961 | 14.61  | H21 | FJ430649 | 4 | / |
| V36 | <i>East/Central</i>          | Amalfi (Italy)               | 40.636 | 14.606 | H21 | FJ430650 | 4 | / |
| V39 | <i>East/South-east-north</i> | Lago Laceno (Italy)          | 40.804 | 15.107 | H26 | FJ430656 | 4 | / |
| V40 | <i>East/South-east-north</i> | Lago di Lesina (Italy)       | 41.896 | 15.379 | H32 | FJ430657 | 4 | / |
| V37 | <i>East/Sicily</i>           | Lago Spartà (Italy)          | 37.955 | 14.715 | H14 | FJ430653 | 4 | / |
| V9  | <i>West</i>                  | Chizé (France)               | 46.124 | -0.356 | H1  | FJ430628 | 4 | / |
| V10 | <i>West</i>                  | Chizé (France)               | 46.124 | -0.357 | H1  | FJ430629 | 4 | / |
| V11 | <i>West</i>                  | Chizé (France)               | 46.124 | -0.357 | H1  | FJ430621 | 4 | / |
| V28 | <i>West</i>                  | /                            | 42.057 | 9.029  | H1  | FJ430654 | 4 | / |

|            |      |                                            |          |         |     |          |            |           |                  |
|------------|------|--------------------------------------------|----------|---------|-----|----------|------------|-----------|------------------|
| V29        | West | Molinos (Spain)                            | 41.603   | 0.685   | H1  | FJ430623 | 4          |           | /                |
| V30        | West | Molinos (Spain)                            |          |         | H1  | FJ430624 | 4          |           | /                |
| V31        | West | Molinos (Spain)                            |          |         | H1  | FJ430625 | 4          |           | /                |
| V32        | West | Pobellà (Spain)                            | 42.374   | 1.11    | H1  | FJ430626 | 4          |           | /                |
| <b>A1</b>  | West | Montanuy (Catalonia. Spain)                | 42.46555 | 0.6941  | H1  | OR229541 | this study | AR        | HV02 1           |
| <b>A4</b>  | West | Latasa (Navarre. Spain)                    | 42.95330 | -1.8222 | H1  | OR229542 | this study | AR        | HV01 1           |
| <b>A6</b>  | West | Irun (Gipuzkoa. Spain)                     | 43.32691 | -1.8125 | H1  | OR229543 | this study | AR        | HV03 1           |
| <b>CP2</b> | West | Tuixent (Catalonia. Spain)                 | 42.22845 | 1.5699  | H1  | OR229544 | this study | UB        | CRBA-<br>43061   |
| <b>CP4</b> | West | Arties (Catalonia. Spain)                  | 42.70085 | 0.8674  | H1  | OR229545 | this study | UB        | CRBA-<br>43072   |
| <b>CP5</b> | West | La Torre de Cabdella<br>(Catalonia. Spain) | 42.42647 | 0.9840  | H1  | OR229546 | this study | UB        | CRBA-<br>43392   |
| <b>CP6</b> | West | Bagà (Catalonia. Spain)                    | 42.25451 | 1.8549  | H1  | OR229547 | this study | UB        | CRBA-<br>52316   |
| <b>AR1</b> | West | Escarrilla (Aragon. Spain)                 | 42.73848 | -0.3147 | H1  | OR229548 | this study | fieldwork | /                |
| <b>AR2</b> | West | Panticosa (Aragon. Spain)                  | 42.72936 | -0.2703 | H1  | OR229549 | this study | fieldwork | /                |
| <b>AR3</b> | West | Benasque (Aragon. Spain)                   | 42.62993 | -0.1076 | H1  | OR229550 | this study | fieldwork | /                |
| <b>AR4</b> | West | Torla (Aragon. Spain)                      | 42.66256 | 0.5842  | H1  | OR229551 | this study | fieldwork | /                |
| <b>C3</b>  | West | Salardú (Catalonia. Spain)                 | 42.70715 | 0.8959  | H1  | OR229552 | this study | MCB       | MZB<br>2010-1425 |
| <b>C4</b>  | West | Torre de Cabdella (Catalonia.<br>Spain)    | 42.42261 | 0.9819  | H10 | OR229553 | this study | MCB       | MZB<br>2014-1957 |

|           |      |                                         |          |         |    |          |            |           |                 |
|-----------|------|-----------------------------------------|----------|---------|----|----------|------------|-----------|-----------------|
|           |      |                                         |          |         |    |          |            |           | MZB             |
| <b>C5</b> | West | Berga (Catalonia. Spain)                | 42.10554 | 1.8431  | H1 |          | this study | MCB       | 2014-1964-B y - |
|           |      |                                         |          |         |    | OR229554 |            |           | T               |
| <b>C6</b> | West | Gisclareny (Catalonia. Spain)           | 42.26934 | 1.8052  | H1 |          | this study | MCB       | MZB             |
|           |      |                                         |          |         |    | OR229555 |            |           | 2017-0156       |
| <b>C7</b> | West | Bagà (Catalonia. Spain)                 | 42.25679 | 1.8479  | H1 |          | this study | MCB       | MZB             |
|           |      |                                         |          |         |    | OR229556 |            |           | 2019-0703       |
| <b>G1</b> | West | Aiako Harriak<br>(Irun.Gipuzkoa. Spain) | 43.31868 | -1.7678 | H1 |          | this study | fieldwork | /               |
|           |      |                                         |          |         |    | OR229557 |            |           |                 |
| <b>G2</b> | West | Aiako Harriak<br>(Irun.Gipuzkoa. Spain) | 43.31868 | -1.7625 | H1 |          | this study | fieldwork | /               |
|           |      |                                         |          |         |    | OR229558 |            |           |                 |
| <b>G3</b> | West | Aiako Harriak<br>(Irun.Gipuzkoa. Spain) | 43.33130 | -1.7558 | H1 |          | this study | fieldwork | /               |
|           |      |                                         |          |         |    | OR229559 |            |           |                 |
| <b>G4</b> | West | Aiako Harriak<br>(Irun.Gipuzkoa. Spain) | 43.33123 | -1.7560 | H1 |          | this study | fieldwork | /               |
|           |      |                                         |          |         |    | OR229560 |            |           |                 |
| <b>G5</b> | West | Aiako Harriak<br>(Irun.Gipuzkoa. Spain) | 43.33120 | -1.7563 | H1 |          | this study | fieldwork | /               |
|           |      |                                         |          |         |    | OR229561 |            |           |                 |
| <b>G6</b> | West | Aiako Harriak<br>(Irun.Gipuzkoa. Spain) | 43.33120 | -1.7563 | H1 |          | this study | fieldwork | /               |
|           |      |                                         |          |         |    | OR229562 |            |           |                 |
| <b>G7</b> | West | Aiako Harriak<br>(Irun.Gipuzkoa. Spain) | 43.33123 | -1.7560 | H1 |          | this study | fieldwork | /               |
|           |      |                                         |          |         |    | OR229563 |            |           |                 |

|            |      |                                         |          |         |    |          |            |           |   |
|------------|------|-----------------------------------------|----------|---------|----|----------|------------|-----------|---|
| <b>G8</b>  | West | Aiako Harriak<br>(Irun.Gipuzkoa. Spain) | 43.32722 | -1.7563 | H1 | OR229564 | this study | fieldwork | / |
| <b>G9</b>  | West | Aiako Harriak<br>(Irun.Gipuzkoa. Spain) | 43.32971 | -1.7634 | H1 | OR229565 | this study | fieldwork | / |
| <b>G10</b> | West | Aiako Harriak<br>(Irun.Gipuzkoa. Spain) | 43.3302  | -1.7646 | H1 | OR229566 | this study | fieldwork | / |
| <b>G11</b> | West | Aiako Harriak<br>(Irun.Gipuzkoa. Spain) | 43.33130 | -1.7558 | H1 | OR229567 | this study | fieldwork | / |
| <b>G12</b> | West | Aiako Harriak<br>(Irun.Gipuzkoa. Spain) | 43.33066 | -1.7647 | H1 | OR229568 | this study | fieldwork | / |
| <b>G13</b> | West | Aiako Harriak<br>(Irun.Gipuzkoa. Spain) | 43.30206 | -1.7549 | H1 | OR229569 | this study | fieldwork | / |
| <b>G14</b> | West | Aiako Harriak<br>(Irun.Gipuzkoa. Spain) | 43.31868 | -1.7625 | H1 | OR229570 | this study | fieldwork | / |
| <b>IP3</b> | West | Orx (France)                            | 43.59037 | -1.3866 | H1 | OR229571 | this study | AR        | / |
| <b>IP5</b> | West | Messanges (France)                      | 43.80951 | -1.3970 | H1 | OR229572 | this study | AR        | / |
| <b>IP6</b> | West | Messanges (France)                      | 43.80573 | -1.3945 | H6 | OR229573 | this study | AR        | / |
| <b>IP8</b> | West | Bayonne (France)                        | 43.47307 | -1.4811 | H1 | OR229574 | this study | AR        | / |
| <b>IP9</b> | West | Bayonne (France)                        | 43.46740 | -1.4801 | H1 | OR229575 | this study | AR        | / |
| <b>N1</b>  | West | Cía (Navarre. Spain)                    | 42.93523 | -1.7567 | H1 | OR229576 | this study | AR        | / |
| <b>N2</b>  | West | Arakil (Navarre. Spain)                 | 42.91728 | -1.8429 | H1 | OR229577 | this study | AR        | / |
| <b>N3</b>  | West | Urritza (Navarre. Spain)                | 42.96165 | -1.8292 | H1 | OR229578 | this study | AR        | / |
| <b>N4</b>  | West | Udabe (Navarre. Spain)                  | 42.97085 | -1.8248 | H1 | OR229579 | this study | AR        | / |

|            |             |                                               |          |         |     |          |            |      |               |
|------------|-------------|-----------------------------------------------|----------|---------|-----|----------|------------|------|---------------|
| <b>N5</b>  | West        | Etxarren (Navarre. Spain)                     | 42.91629 | -1.8485 | H1  | OR229580 | this study | AR   | /             |
| <b>N7</b>  | West        | Ostiz (Navarre. Spain)                        | 42.92040 | -1.6253 | H1  | OR229581 | this study | AR   | /             |
| <b>P1</b>  | East/Sicily | Parco Nazionale<br>dell'Aspromonte (Italy)    | 38.2902  | 16.037  | H14 | OR229582 | this study | CEFE | BEV.14548     |
| <b>P7</b>  | West        | Calvi (Corse. France)                         | 42.56765 | 8.7572  | H1  | OR229583 | this study | CEFE | BEV.5         |
| <b>P10</b> | West        | Pirio (Tuarelli. Corse. France)               | 42.37545 | 8.7513  | H8  | OR229584 | this study | CEFE | BEV.22        |
| <b>P14</b> | West        | Fango (Corse. France)                         | 42.40176 | 8.6976  | H1  | OR229585 | this study | CEFE | BEV.59        |
| <b>P15</b> | West        | Sagone (Corse. France)                        | 42.11016 | 8.6865  | H1  | OR229586 | this study | CEFE | BEV.857       |
| <b>P16</b> | West        | Aleria (Corse. France)                        | 42.15085 | 9.5066  | H1  | OR229587 | this study | CEFE | BEV.8264      |
| <b>P17</b> | West        | Route D81 (Corse. France)                     | 42.46638 | 8.7566  | H1  | OR229588 | this study | CEFE | BEV.8266      |
| <b>P18</b> | West        | Galéria (Corse. France)                       | 42.41035 | 8.6486  | H1  | OR229589 | this study | CEFE | BEV.8353      |
| <b>P20</b> | West        | Biguglia (Corse. France)                      | 42.60742 | 9.4847  | H1  | OR229590 | this study | CEFE | BEV.8562      |
| <b>P22</b> | West        | Palombaggia (Corse. France)                   | 41.56552 | 9.2773  | H8  | OR229591 | this study | CEFE | BEV.10933     |
| <b>P23</b> | West        | Losari (Corse. France)                        | 42.63338 | 9.0058  | H12 | OR229592 | this study | CEFE | BEV.11044     |
| <b>P24</b> | West        | Urtaca (Corse. France)                        | 42.62197 | 9.1202  | H1  | OR229593 | this study | CEFE | BEV.11051     |
| <b>P25</b> | West        | Golf de Sperone (Bonifacio.<br>Corse. France) | 41.37320 | 9.2102  | H1  | OR229594 | this study | CEFE | BEV.11060     |
| <b>P27</b> | West        | Galéria (Corse. France)                       | 42.41671 | 8.6584  | H1  | OR229595 | this study | CEFE | BEV.11295     |
| <b>P28</b> | West        | Frassigna (Corse. France)                     | 42.4495  | 8.8289  | H1  | OR229596 | this study | CEFE | BEV.10149     |
| <b>P29</b> | West        | Galéria (Corse. France)                       | 42.3518  | 8.6461  | H1  | OR229597 | this study | CEFE | BEV.10892     |
| <b>P30</b> | West        | Aleria (Corse. France)                        | 42.105   | 9.5236  | H1  | OR229598 | this study | CEFE | BEV.<br>T4452 |

|            |      |                                                             |          |        |     |          |            |      |               |
|------------|------|-------------------------------------------------------------|----------|--------|-----|----------|------------|------|---------------|
| <b>P31</b> | West | Travo (Corse. France)                                       | 41.90607 | 9.3919 | H1  | OR229599 | this study | CEFE | BEV.<br>T4453 |
| <b>P32</b> | West | St Julien de Rodelle (France)                               | 44.49945 | 2.6630 | H1  | OR229600 | this study | CEFE | BEV.8         |
| <b>P37</b> | West | Le Caylar (France)                                          | 43.85700 | 3.3176 | H1  | OR229601 | this study | CEFE | BEV.13        |
| <b>P49</b> | West | Clamensane (France)                                         | 44.3241  | 6.0692 | H1  | OR229602 | this study | CEFE | BEV.280       |
| <b>P53</b> | West | Florac (France)                                             | 44.31460 | 3.6183 | H1  | OR229603 | this study | CEFE | BEV.6201      |
| <b>P64</b> | West | Gréolières (France)                                         | 43.78712 | 6.9738 | H1  | OR229604 | this study | CEFE | BEV.8143      |
| <b>P65</b> | West | Andon (France)                                              | 43.78266 | 6.8475 | H1  | OR229605 | this study | CEFE | BEV.8144      |
| <b>P66</b> | West | St-Sauveur sur Tinée<br>(France)                            | 44.08873 | 7.0422 | H1  | OR229606 | this study | CEFE | BEV.8145      |
| <b>P67</b> | West | Rosignano Marittimo (Italy)                                 | 43.38033 | 10.481 | H1  | OR229607 | this study | CEFE | BEV.8263      |
| <b>P68</b> | West | Larzac (France)                                             | 44.09341 | 3.1171 | H13 | OR229608 | this study | CEFE | BEV.8563      |
| <b>P69</b> | West | Rochefort-en-Valdaine<br>(France)                           | 44.5164  | 4.8611 | H1  | OR229609 | this study | CEFE | BEV.8873      |
| <b>P70</b> | West | Brusques (France)                                           | 43.76797 | 2.9533 | H1  | OR229610 | this study | CEFE | BEV.8897      |
| <b>P72</b> | West | Commune de Montagnac la<br>Crempx (Dordogne. France)        | 44.98050 | 0.5463 | H1  | OR229611 | this study | CEFE | BEV.9093      |
| <b>P74</b> | West | Millau (France)                                             | 44.09535 | 3.0466 | H7  | OR229612 | this study | CEFE | BEV.10391     |
| <b>P75</b> | West | Gatuzières (France)                                         | 44.17984 | 3.5104 | H1  | OR229613 | this study | CEFE | BEV.11014     |
| <b>P76</b> | West | Gatuzières (France)                                         | 44.17984 | 3.5104 | H1  | OR229614 | this study | CEFE | BEV.11015     |
| <b>P77</b> | West | Route D107 entre Blegiers et<br>Prads-Haute-Bleone (France) | 44.20317 | 6.4230 | H1  | OR229615 | this study | CEFE | BEV.11025     |
| <b>P78</b> | West | Castellane (France)                                         | 43.78525 | 6.7460 | H1  | OR229616 | this study | CEFE | BEV.11026     |

|            |      |                    |          |        |    |          |            |      |           |
|------------|------|--------------------|----------|--------|----|----------|------------|------|-----------|
| <b>P79</b> | West | Orlu (France)      | 42.70100 | 1.8903 | H1 | OR229617 | this study | CEFE | BEV.11059 |
| <b>P82</b> | West | Larzac (France)    | 43.98176 | 3.1432 | H1 | OR229618 | this study | CEFE | BEV.11525 |
| <b>P85</b> | West | Massegros (France) | 44.30779 | 3.1724 | H1 | OR229619 | this study | CEFE | BEV.9251  |
| <b>P87</b> | West | Bessières (France) | 43.78675 | 1.5770 | H1 | OR229620 | this study | CEFE | BEV.14443 |

Publications referred as numbers:

1. Senczuk, G.; Gramolini, L.; Avella, I.; Mori, E.; Menchetti, M.; Aloise, G.; Castiglia, R. No association between candidate genes for color determination and color phenotype in *Hierophis viridiflavus*, and characterization of a contact zone. *J. Zoolog. Syst. Evol.* **2021**, *59*(3), 748–759.
2. Avella, I.; Castiglia, R.; Senczuk, G. Who are you? The genetic identity of some insular populations of *Hierophis viridiflavus* s.l. from the Tyrrhenian Sea. *Acta Herpetol.* **2017**, *12*, 209–214.
3. Mezzasalma, M.; Dall'Asta, A.; Loy, A.; Cheylan, M.; Lymberakis, P.; Zuffi, M.A.L.; Tomovic, L.; Odierna, G.; Guarino, F.M. A sisters' story: Comparative phylogeography and taxonomy of *Hierophis viridiflavus* and *H. gemonensis* (Serpentes, Colubridae). *Zool. Scr.* **2015**, *44*, 495–508.
4. Rato, C.; Zuffi, M.A.L.; Corti, C.; Fornasiero, S.; Gentilli, A.; Razzetti, E.; Scali, S.; Carretero, M.A.; Harris, D.J. Phylogeography of the European Whip Snake, *Hierophis viridiflavus* (Colubridae), using mtDNA and nuclear DNA sequences. *Amphib-reptil.* **2009**, *30*, 283– 289.

Collections referred with acronyms: UB - Universitat de Barcelona (Barcelona, Spain); MCB - Museu de Ciències Naturals de Barcelona (Barcelona, Spain); CEFE - Collection of the Biogeography and Ecology of the Vertebrates team in Montpellier (Montpellier, France); AR - Aranzadi Science Collection (Donostia, Spain).

**Table S2** – Model ranking obtained from R package ENMeval in order to address Maxent model parameterization. FC= Feature class, RM= Regularization multiplier, AUC= Area under the curve, OR10= omission rate of testing localities at the 10% training threshold, AICc = Akaike’s Information Criterion.

|    | fc    | rm  | auc.train | cibi.train | auc.diff | avgauc.diff | sdauc.val | avgauc.val | sdcbi.val | avgcibi.val | sdor.10p | avgor.10p | sdor.mtp | avgor.mtp | sd | AICc    | delta.AICc | w.AIC | ncoef |
|----|-------|-----|-----------|------------|----------|-------------|-----------|------------|-----------|-------------|----------|-----------|----------|-----------|----|---------|------------|-------|-------|
| 6  | LQHPT | 0.5 | 0.792     | 1.000      | 0.007    | 0.008       | 0.789     | 0.008      | 0.998     | 0.001       | 0.108    | 0.013     | 0.000    | 0.000     |    | 811.981 | 0          | 1     | 89    |
| 37 | L     | 3.5 | 0.665     | 0.872      | 0.006    | 0.005       | 0.665     | 0.006      | 0.854     | 0.055       | 0.098    | 0.013     | 0.000    | 0.000     |    | 843.009 | 3.102      | 0     | 3     |
| 40 | LQH   | 3.5 | 0.753     | 1.000      | 0.008    | 0.006       | 0.752     | 0.008      | 0.997     | 0.001       | 0.100    | 0.018     | 0.000    | 0.000     |    | 823.131 | 11.150     | 0     | 19    |
| 27 | LQ    | 2.5 | 0.689     | 0.897      | 0.006    | 0.005       | 0.690     | 0.006      | 0.883     | 0.060       | 0.099    | 0.011     | 0.000    | 0.001     |    | 839.233 | 27.252     | 0     | 5     |
| 39 | LQ    | 3.5 | 0.669     | 0.861      | 0.006    | 0.005       | 0.672     | 0.009      | 0.849     | 0.075       | 0.101    | 0.011     | 0.000    | 0.000     |    | 842.382 | 30.400     | 0     | 4     |
| 44 | Q     | 4   | 0.645     | 0.680      | 0.006    | 0.005       | 0.645     | 0.006      | 0.663     | 0.097       | 0.101    | 0.010     | 0.000    | 0.000     |    | 846.467 | 34.486     | 0     | 3     |
| 36 | LQHPT | 3   | 0.767     | 1.000      | 0.008    | 0.007       | 0.764     | 0.009      | 0.993     | 0.006       | 0.100    | 0.014     | 0.000    | 0.000     |    | 819.579 | 75.981     | 0     | 32    |
| 28 | LQH   | 2.5 | 0.756     | 1.000      | 0.008    | 0.006       | 0.755     | 0.008      | 0.997     | 0.002       | 0.101    | 0.015     | 0.000    | 0.000     |    | 822.002 | 100.209    | 0     | 23    |
| 35 | LQHP  | 3   | 0.756     | 1.000      | 0.008    | 0.006       | 0.754     | 0.008      | 0.997     | 0.001       | 0.100    | 0.016     | 0.000    | 0.000     |    | 822.107 | 101.261    | 0     | 15    |
| 34 | LQH   | 3   | 0.755     | 1.000      | 0.008    | 0.006       | 0.753     | 0.008      | 0.997     | 0.002       | 0.099    | 0.014     | 0.000    | 0.000     |    | 822.420 | 104.393    | 0     | 17    |
| 41 | LQHP  | 3.5 | 0.754     | 1.000      | 0.008    | 0.006       | 0.752     | 0.008      | 0.996     | 0.002       | 0.100    | 0.017     | 0.000    | 0.000     |    | 822.833 | 108.518    | 0     | 18    |
| 47 | LQHP  | 4   | 0.752     | 1.000      | 0.008    | 0.006       | 0.751     | 0.008      | 0.996     | 0.002       | 0.101    | 0.018     | 0.000    | 0.000     |    | 823.349 | 113.680    | 0     | 15    |
| 46 | LQH   | 4   | 0.752     | 1.000      | 0.008    | 0.006       | 0.751     | 0.008      | 0.996     | 0.003       | 0.101    | 0.019     | 0.000    | 0.000     |    | 823.672 | 116.906    | 0     | 17    |
| 3  | LQ    | 0.5 | 0.718     | 0.988      | 0.006    | 0.005       | 0.717     | 0.006      | 0.975     | 0.020       | 0.101    | 0.017     | 0.000    | 0.000     |    | 831.916 | 199.348    | 0     | 7     |
| 9  | LQ    | 1   | 0.711     | 0.898      | 0.006    | 0.005       | 0.711     | 0.005      | 0.865     | 0.097       | 0.099    | 0.013     | 0.000    | 0.000     |    | 834.618 | 226.375    | 0     | 7     |
| 15 | LQ    | 1.5 | 0.705     | 0.811      | 0.006    | 0.005       | 0.705     | 0.005      | 0.812     | 0.124       | 0.098    | 0.014     | 0.000    | 0.000     |    | 836.08  | 241.013    | 0     | 5     |
| 21 | LQ    | 2   | 0.698     | 0.822      | 0.006    | 0.005       | 0.698     | 0.006      | 0.822     | 0.087       | 0.100    | 0.012     | 0.000    | 0.001     |    | 837.623 | 256.418    | 0     | 5     |
| 12 | LQHPT | 1   | 0.784     | 1.000      | 0.007    | 0.008       | 0.781     | 0.008      | 0.994     | 0.002       | 0.104    | 0.018     | 0.000    | 0.000     |    | 814.597 | 261.611    | 0     | 69    |
| 33 | LQ    | 3   | 0.680     | 0.868      | 0.006    | 0.005       | 0.681     | 0.008      | 0.860     | 0.070       | 0.099    | 0.012     | 0.000    | 0.000     |    | 840.794 | 288.128    | 0     | 4     |
| 1  | L     | 0.5 | 0.667     | 0.906      | 0.005    | 0.005       | 0.667     | 0.006      | 0.880     | 0.068       | 0.100    | 0.011     | 0.000    | 0.000     |    | 842.380 | 303.993    | 0     | 4     |
| 7  | L     | 1   | 0.667     | 0.884      | 0.005    | 0.005       | 0.667     | 0.006      | 0.872     | 0.064       | 0.099    | 0.010     | 0.000    | 0.000     |    | 842.464 | 304.827    | 0     | 4     |
| 13 | L     | 1.5 | 0.667     | 0.872      | 0.005    | 0.005       | 0.667     | 0.006      | 0.863     | 0.064       | 0.099    | 0.010     | 0.000    | 0.000     |    | 842.534 | 305.582    | 0     | 3     |
| 19 | L     | 2   | 0.667     | 0.868      | 0.005    | 0.005       | 0.666     | 0.006      | 0.863     | 0.055       | 0.099    | 0.011     | 0.000    | 0.000     |    | 842.646 | 306.651    | 0     | 3     |
| 25 | L     | 2.5 | 0.666     | 0.872      | 0.006    | 0.005       | 0.666     | 0.006      | 0.856     | 0.056       | 0.099    | 0.013     | 0.000    | 0.000     |    | 842.769 | 307.786    | 0     | 3     |
| 31 | L     | 3   | 0.666     | 0.871      | 0.006    | 0.005       | 0.665     | 0.006      | 0.854     | 0.054       | 0.099    | 0.013     | 0.000    | 0.000     |    | 842.881 | 308.996    | 0     | 3     |
| 43 | L     | 4   | 0.664     | 0.871      | 0.006    | 0.005       | 0.664     | 0.006      | 0.850     | 0.056       | 0.098    | 0.014     | 0.000    | 0.000     |    | 843.144 | 311.628    | 0     | 3     |
| 45 | LQ    | 4   | 0.664     | 0.871      | 0.006    | 0.005       | 0.666     | 0.008      | 0.852     | 0.059       | 0.099    | 0.012     | 0.000    | 0.000     |    | 843.144 | 311.628    | 0     | 3     |
| 2  | Q     | 0.5 | 0.657     | 0.818      | 0.005    | 0.005       | 0.657     | 0.005      | 0.783     | 0.036       | 0.100    | 0.011     | 0.000    | 0.000     |    | 845.618 | 336.371    | 0     | 4     |
| 8  | Q     | 1   | 0.658     | 0.802      | 0.005    | 0.005       | 0.657     | 0.006      | 0.782     | 0.039       | 0.099    | 0.011     | 0.000    | 0.000     |    | 845.709 | 337.276    | 0     | 4     |
| 14 | Q     | 1.5 | 0.657     | 0.792      | 0.005    | 0.005       | 0.656     | 0.006      | 0.768     | 0.038       | 0.099    | 0.011     | 0.000    | 0.000     |    | 845.790 | 338.094    | 0     | 3     |
| 20 | Q     | 2   | 0.655     | 0.771      | 0.005    | 0.005       | 0.655     | 0.006      | 0.749     | 0.048       | 0.100    | 0.011     | 0.000    | 0.000     |    | 845.906 | 339.246    | 0     | 3     |
| 26 | Q     | 2.5 | 0.653     | 0.751      | 0.005    | 0.005       | 0.653     | 0.006      | 0.731     | 0.060       | 0.100    | 0.011     | 0.000    | 0.000     |    | 846.031 | 340.500    | 0     | 3     |
| 32 | Q     | 3   | 0.651     | 0.734      | 0.005    | 0.005       | 0.651     | 0.006      | 0.711     | 0.076       | 0.100    | 0.011     | 0.000    | 0.000     |    | 846.166 | 341.854    | 0     | 3     |
| 38 | Q     | 3.5 | 0.648     | 0.708      | 0.005    | 0.005       | 0.648     | 0.006      | 0.685     | 0.088       | 0.101    | 0.010     | 0.000    | 0.000     |    | 846.312 | 343.308    | 0     | 3     |
| 11 | LQHP  | 1   | 0.777     | 1.000      | 0.007    | 0.006       | 0.775     | 0.007      | 0.998     | 0.001       | 0.103    | 0.012     | 0.000    | 0.000     |    | 816.189 | 420.839    | 0     | 35    |
| 18 | LQHPT | 1.5 | 0.776     | 1.000      | 0.007    | 0.008       | 0.774     | 0.008      | 0.992     | 0.005       | 0.103    | 0.021     | 0.000    | 0.000     |    | 816.642 | 466.146    | 0     | 50    |

|    |       |     |       |       |       |       |       |       |       |       |       |       |       |       |         |         |   |    |
|----|-------|-----|-------|-------|-------|-------|-------|-------|-------|-------|-------|-------|-------|-------|---------|---------|---|----|
| 4  | LQH   | 0.5 | 0.773 | 1.000 | 0.006 | 0.006 | 0.771 | 0.007 | 0.996 | 0.002 | 0.103 | 0.013 | 0.000 | 0.000 | 816.737 | 475.618 | 0 | 40 |
| 24 | LQHPT | 2   | 0.773 | 1.000 | 0.007 | 0.008 | 0.769 | 0.008 | 0.992 | 0.006 | 0.101 | 0.019 | 0.000 | 0.000 | 817.754 | 577.335 | 0 | 42 |
| 30 | LQHPT | 2.5 | 0.770 | 1.000 | 0.008 | 0.007 | 0.766 | 0.008 | 0.992 | 0.007 | 0.102 | 0.016 | 0.000 | 0.000 | 818.752 | 677.060 | 0 | 39 |
| 10 | LQH   | 1   | 0.766 | 1.000 | 0.007 | 0.007 | 0.765 | 0.008 | 0.995 | 0.003 | 0.100 | 0.018 | 0.000 | 0.000 | 818.835 | 685.419 | 0 | 31 |
| 17 | LQHP  | 1.5 | 0.767 | 1.000 | 0.007 | 0.006 | 0.763 | 0.008 | 0.997 | 0.002 | 0.099 | 0.012 | 0.000 | 0.000 | 818.889 | 690.789 | 0 | 27 |
| 16 | LQH   | 1.5 | 0.761 | 1.000 | 0.007 | 0.006 | 0.759 | 0.007 | 0.996 | 0.002 | 0.100 | 0.016 | 0.000 | 0.000 | 820.240 | 825.881 | 0 | 24 |
| 42 | LQHPT | 3.5 | 0.765 | 0.999 | 0.008 | 0.007 | 0.762 | 0.008 | 0.990 | 0.007 | 0.100 | 0.015 | 0.000 | 0.000 | 820.340 | 835.909 | 0 | 29 |
| 5  | LQHP  | 0.5 | 0.789 | 1.000 | 0.007 | 0.005 | 0.787 | 0.007 | 0.998 | 0.001 | 0.103 | 0.009 | 0.000 | 0.000 | 812.823 | 842.299 | 0 | 51 |
| 23 | LQHP  | 2   | 0.758 | 1.000 | 0.007 | 0.006 | 0.757 | 0.007 | 0.997 | 0.001 | 0.101 | 0.015 | 0.000 | 0.000 | 820.924 | 894.335 | 0 | 22 |
| 48 | LQHPT | 4   | 0.763 | 0.999 | 0.008 | 0.007 | 0.761 | 0.008 | 0.988 | 0.006 | 0.101 | 0.016 | 0.000 | 0.000 | 820.946 | 896.481 | 0 | 23 |
| 22 | LQH   | 2   | 0.757 | 1.000 | 0.008 | 0.006 | 0.756 | 0.007 | 0.996 | 0.001 | 0.101 | 0.016 | 0.000 | 0.000 | 821.261 | 928.036 | 0 | 21 |
| 29 | LQHP  | 2.5 | 0.757 | 1.000 | 0.008 | 0.006 | 0.756 | 0.008 | 0.997 | 0.001 | 0.103 | 0.015 | 0.000 | 0.000 | 821.774 | 979.303 | 0 | 26 |

## Supplementary figures

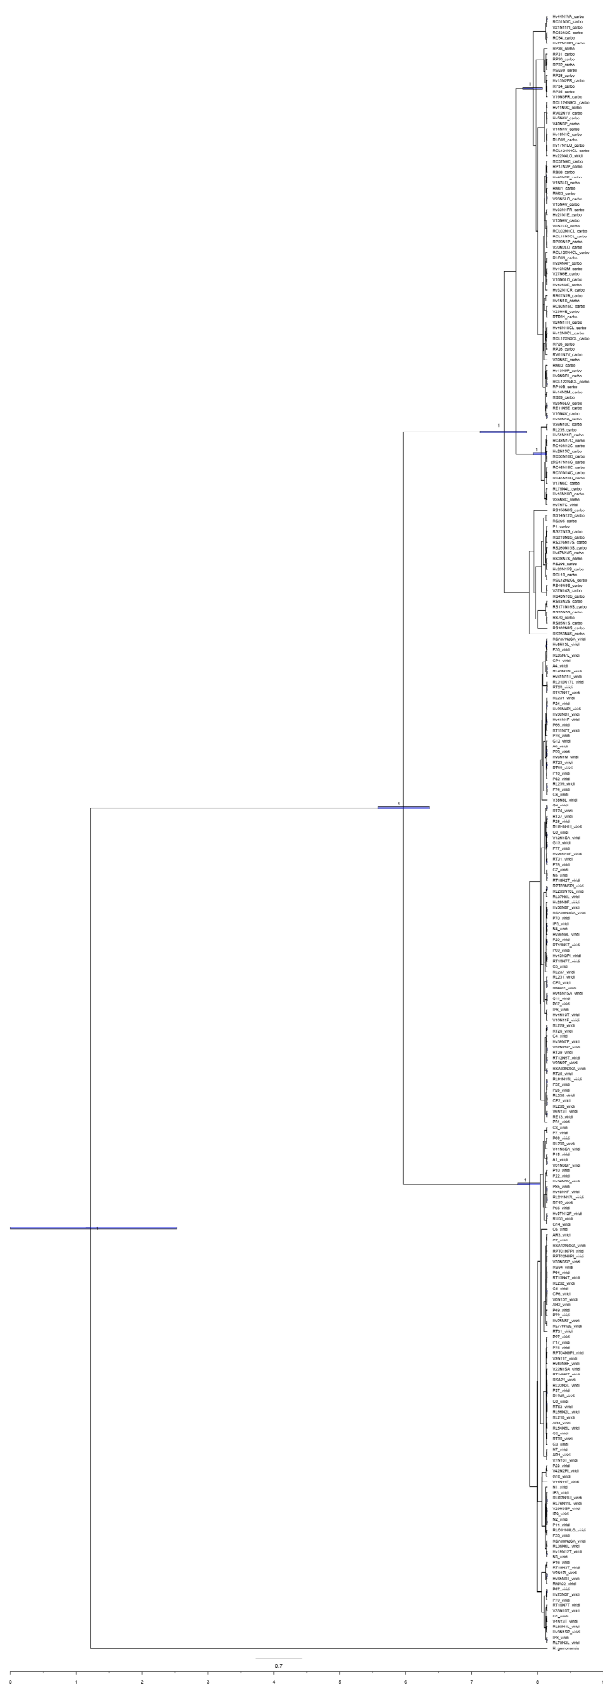

**Figure S1.** Calibrated BEAST phylogenetic tree with the codes of all sequences that were considered in the analysis, the values of node support and the node bars that indicate the divergence date 95% highest posterior density.

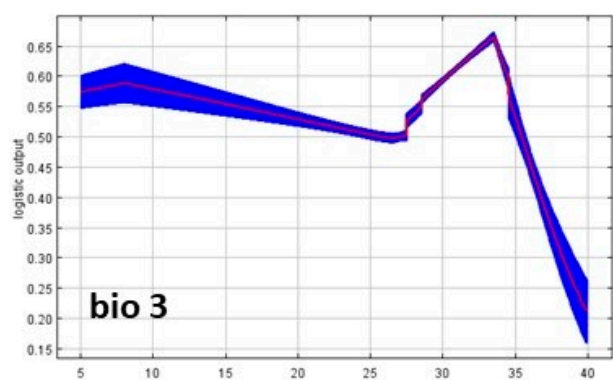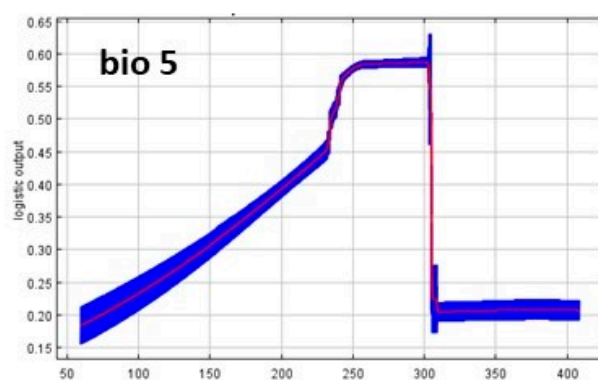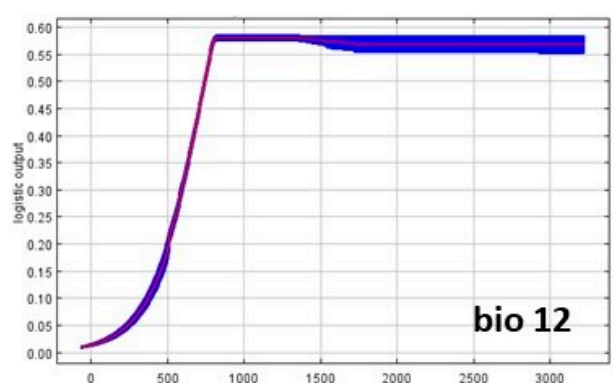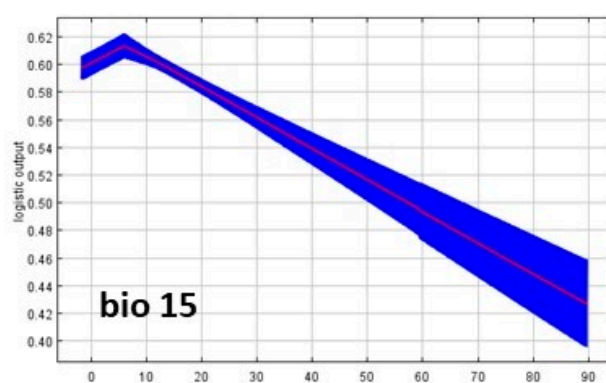

**Figure S2.** Average response curve profiles for the used variables. See table 2 for variables names.

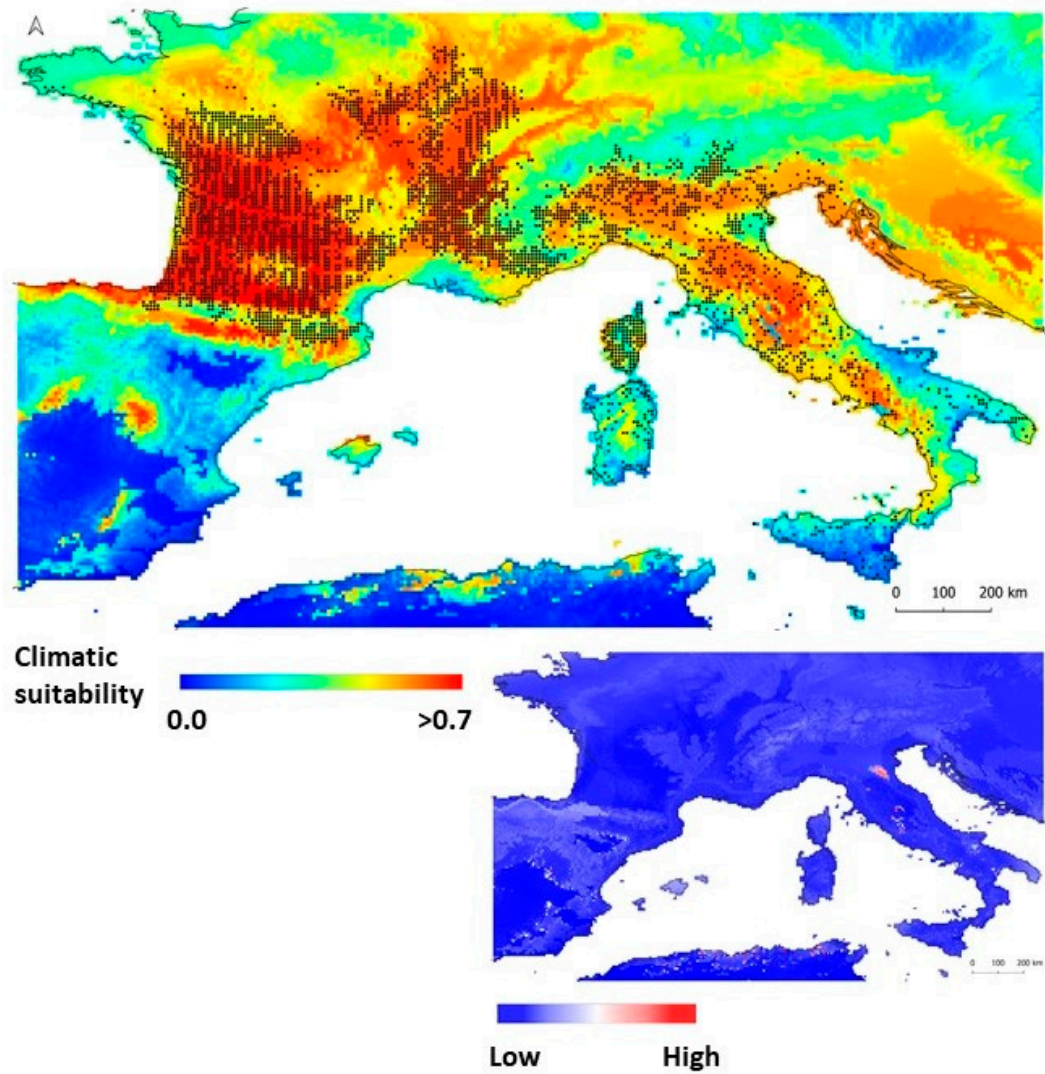

**Figure S3.** Average suitability (top) and SD model (bottom) for current conditions for *Hierophis viridiflavus*. Dots in the suitability map correspond to all samples used for modeling.

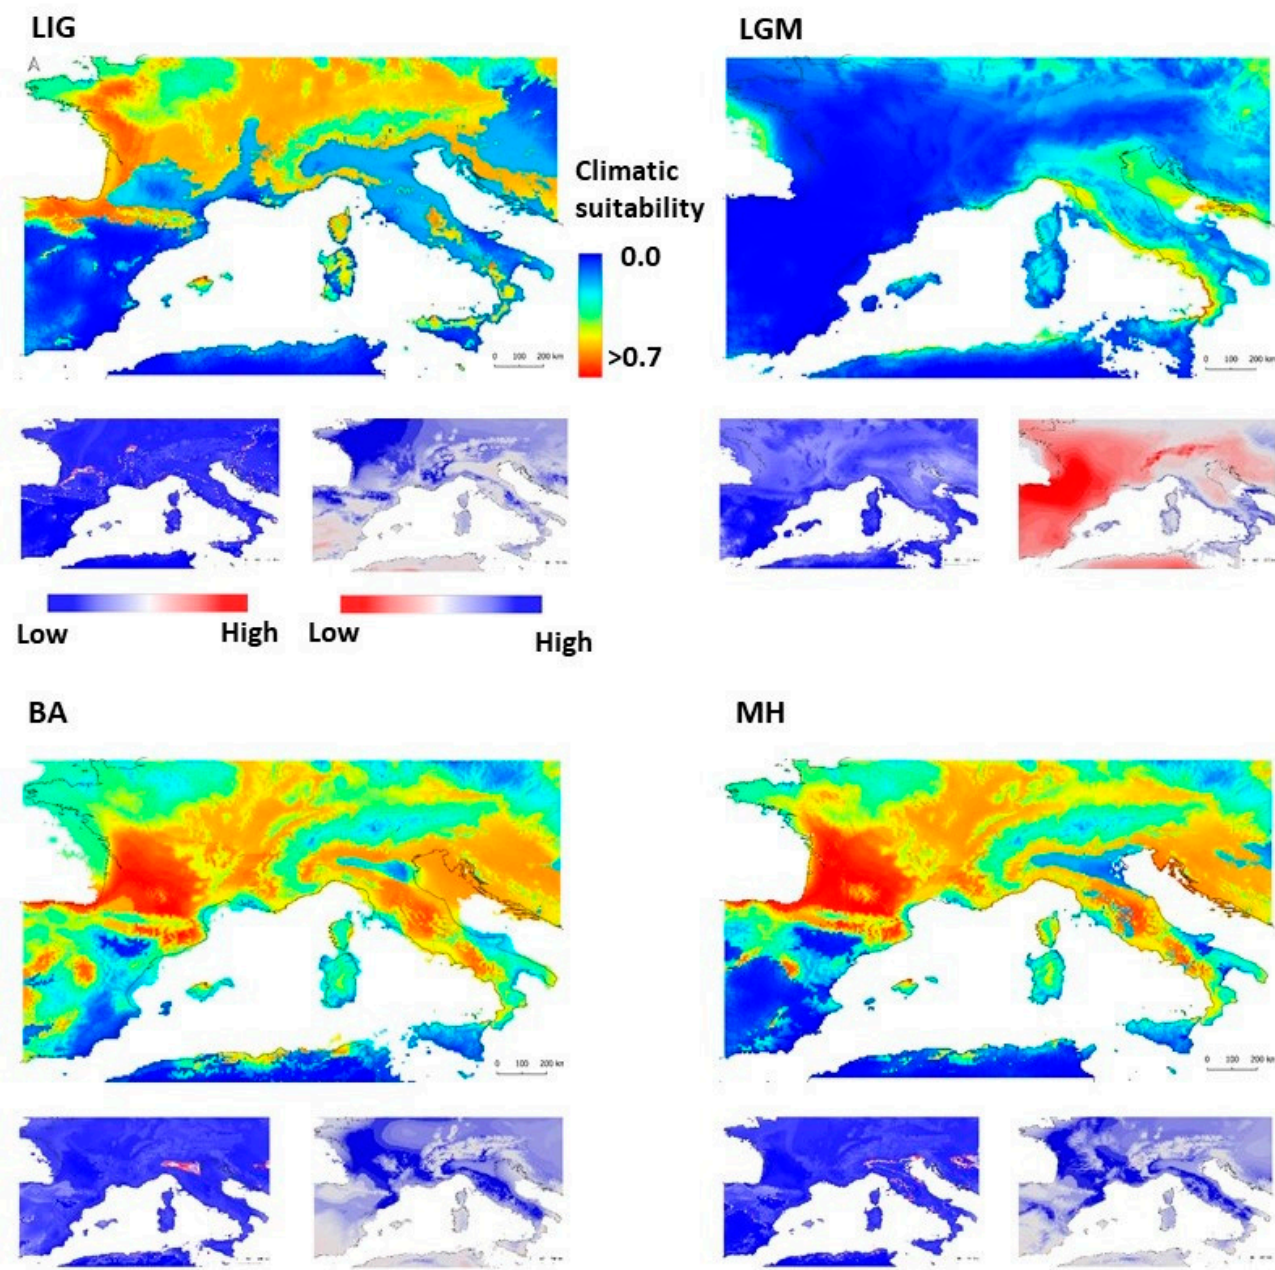

**Figure S4.** Average suitability projections (top), and SD (bottom left) and MESS (bottom right) plots, for four different past periods (LIG – Last Interglacial; LGM - Last Glacial Maximum; BA - Bølling-Allerød; MH - mid Holocene) for *Hierophis viridiflavus*.
